# Supplementary material
Source: PubMed Central journal article supplement (PMC4403182)
Supplement: pnas.201422238SI.pdf [file pnas.201422238SI.pdf]

# Supporting Information

Buitrago et al. 10.1073/pnas.1422238112

## SI Methods

**ThromboGenomics Consortium List of Authors.** Marie-Christine Alessi, Matthias Ballmaier, Tadbir Bariana, Daniel Bellissimo, Marta Bertoli, Paul Bray, Loredana Bury, Robin Carrell, Marco Cattaneo, Peter Collins, Deborah French, Remi Favier, Kathleen Freson, Bruce Furie, Manuela Germeshausen, Cedric Ghevaert, Keith Gomez, Anne Goodeve, Paolo Gresele, Jose Guerrero, Dan J. Hampshire, Charaka Hadinnapola, Johan Heemskerk, Yvonne Henskens, Marian Hill, Nancy Hogg, Jill Johnsen, Walter Kahr, Ron Kerr, Shinji Kunishima, Michael Laffan, Jonathan Langdown, Nick Lench, Claire Lentaigne, Ri Liesner, David Lillcrap, Jose Lopez, Karyn Megy, Carolyn Millar, Nick Morrell, Andrew Mumford, Amit Natwani, Marguerite Neerman-Arbez, Paquita Nurden, Alan Nurden, Mark Ormiston, Maha Othman, Willem Ouwehand, David Perry, Shoshana Ravel Vilk, Pieter Reitsma, Matthew Rondina, Ilenia Simeoni, Peter Smethurst, Jonathan Stephens, William Stevenson, Artur Szkotak, Ernest Turro, Christel Van Geet, Minka Vries, June Ward, John Wayne, Sarah Westbury, Sidney Whiteheart, David Wilcox, Bi Zhang.

**ThromboGenomics Working Group.** This study is part of the ThromboGenomics working group of the Scientific and Standardization Committee of the International Society for Thrombosis and Haemostasis, which is committed to improving the diagnosis of rare inherited bleeding and platelet disorders by taking advantage of advances in next generation sequencing and DNA capture technologies. Its goal is to develop a publicly accessible reference database of genes and DNA sequence variants related to bleeding disorders and to establish a gene panel to test for the presence of such gene lesions. Descriptions of its projects and its curation and approval processes are described on its website (<https://thrombogenomics.org.uk>).

**Mutagenesis, Cell Transfection, and  $\alpha$ IIb $\beta$ 3 Analysis.** Variants  $\alpha$ IIb P176H, P943A and  $\beta$ 3 C547G were generated using the QuikChange XL Site-directed Mutagenesis Kit (Stratagene) according to the manufacturer's instructions. The different cDNAs

were all sequenced to confirm that the variants were introduced as predicted.

HEK293 cells were transfected with either normal human  $\alpha$ IIb and  $\beta$ 3 or variant cDNA's using Fugene 6 mammalian transfection reagent (Promega). Cells were harvested 48 h after transfection in Hepes-modified Tyrode's (HBMT) buffer containing 1 mM  $MgCl_2$  and 2 mM  $CaCl_2$  ( $10^5$  cells/mL, 100  $\mu$ L) and incubated with Alexafluor 488-conjugated mAb 10E5 (10  $\mu$ g/mL), which binds to the cap region of the  $\alpha$ IIb  $\beta$ -propeller domain (1), to assess  $\alpha$ IIb $\beta$ 3 expression. To assess  $\alpha$ IIb $\beta$ 3 ligand binding, cells were incubated for 30 min at 37 °C with 1 mM DTT and 200  $\mu$ g/mL Alexa647-conjugated fibrinogen, with or without 10 mM EDTA. Cells were washed and resuspended in HBMT buffer containing 1 mM  $MgCl_2$  and 2 mM  $CaCl_2$  and analyzed by flow cytometry. Data are expressed as net normalized fibrinogen binding (Alexa647-conjugated fibrinogen geometric mean fluorescence intensity in the absence of EDTA minus Alexa647-conjugated fibrinogen geometric mean fluorescence intensity in the presence of EDTA, divided by  $\alpha$ IIb $\beta$ 3 expression as judged by the binding of mAb 10E5).

Transfected cells were also analyzed by immunoblotting for  $\alpha$ IIb and  $\beta$ 3 expression. Cells were washed in PBS and lysed by incubation for 60 min with lysis buffer consisting of 150 mM NaCl, 25 mM Tris/HCl, 1% Nonidet P-40, 2 mM EDTA, 1 mM sodium orthovanadate, 10 mM sodium fluoride, and 10  $\mu$ g/mL leupeptin, pH 7.4. After centrifugation, protein content was determined (BCA protein assay kit; Thermo Scientific) and 40–80  $\mu$ g of total cell lysate was electrophoresed on 7.5% SDS/PAGE gels. Proteins were transferred to a nitrocellulose membrane (Millipore), blocked for 1 h with a proprietary blocking buffer (Odyssey), and incubated with the appropriate primary antibody at a dilution of 1:1,000 (vol/vol) in the same blocking buffer with 0.1% (vol/vol) Tween 20 (16 h, 4 °C). After washing, membranes were incubated at 4 °C with species-specific, infrared-labeled secondary antibodies (LI-COR). Protein bands were visualized using an infra-red detector (Odyssey).

1. Xiao T, Takagi J, Collier BS, Wang JH, Springer TA (2004) Structural basis for allostery in integrins and binding to fibrinogen-mimetic therapeutics. *Nature* 432(7013):59–67.



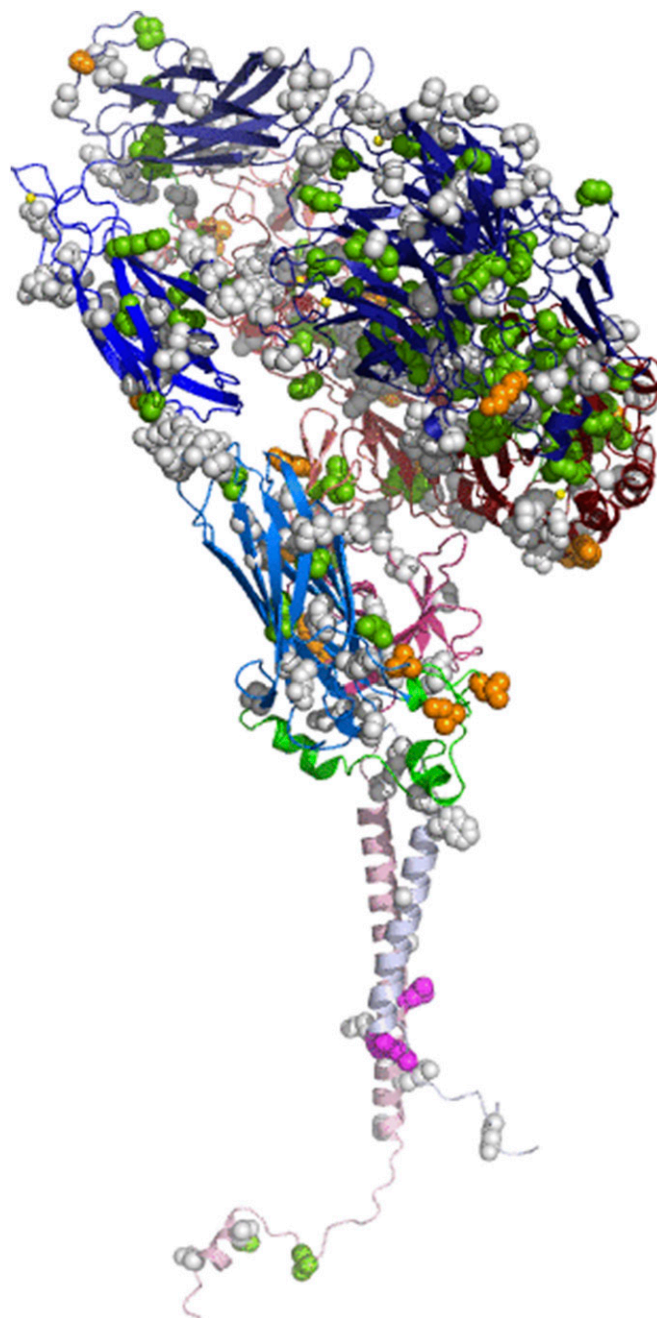

**Movie S1.** Model of  $\alpha\text{IIb}\beta\text{3}$  with Glanzmann thrombasthenia mutations (green spheres), macro/anisothrombocytopenia mutations (magenta spheres), allo-antigens (orange spheres), and novel missense variants (gray spheres).

[Movie S1](#)

## Other Supporting Information Files

[Table S1 \(DOCX\)](#)

[Table S2 \(DOCX\)](#)

[Table S3 \(DOCX\)](#)
